# Supplementary material
Source: bioRxiv or medRxiv preprint supplement (https://www.biorxiv.org/highwire/filestream/4773/field_highwire_adjunct_files/0/018143-1.pdf)
Supplement: Supplementary file [file 018143-1.pdf]

## Supplementary Figures

### Supplementary Figure 1. k-Means clustering confirms visually-observed subpopulations.

Individuals were clustered using *k*-means clustering with  $k = 5$  on the top 4 PCs. 5 clusters were the minimum number of clusters that produced results consistent between runs. Clusters were labeled and assigned colors based upon where they fell relative to predicted fractional ancestry and where projected populations lay.

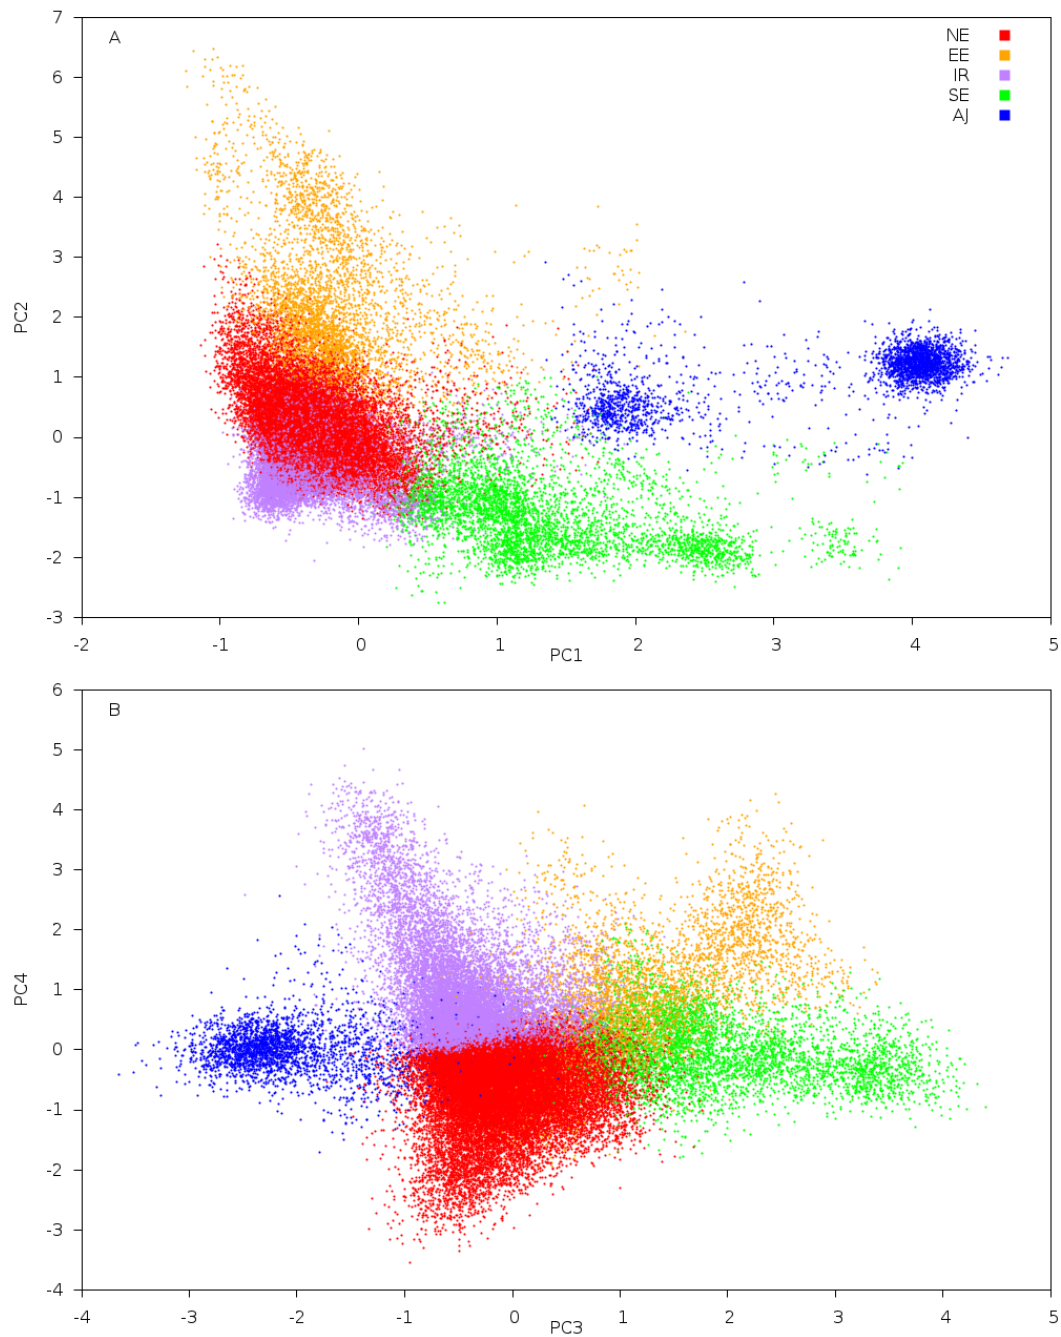

**Supplementary Figure 2. QQ-plot of the selection statistic in null simulations.**

The selection statistic was generated for null simulations containing 6 populations and differing by  $F_{ST} = 0.001$  and  $F_{ST} = 0.01$ . The p-values of the selection statistic for the first PC did not significantly deviate from the distribution expected under null.

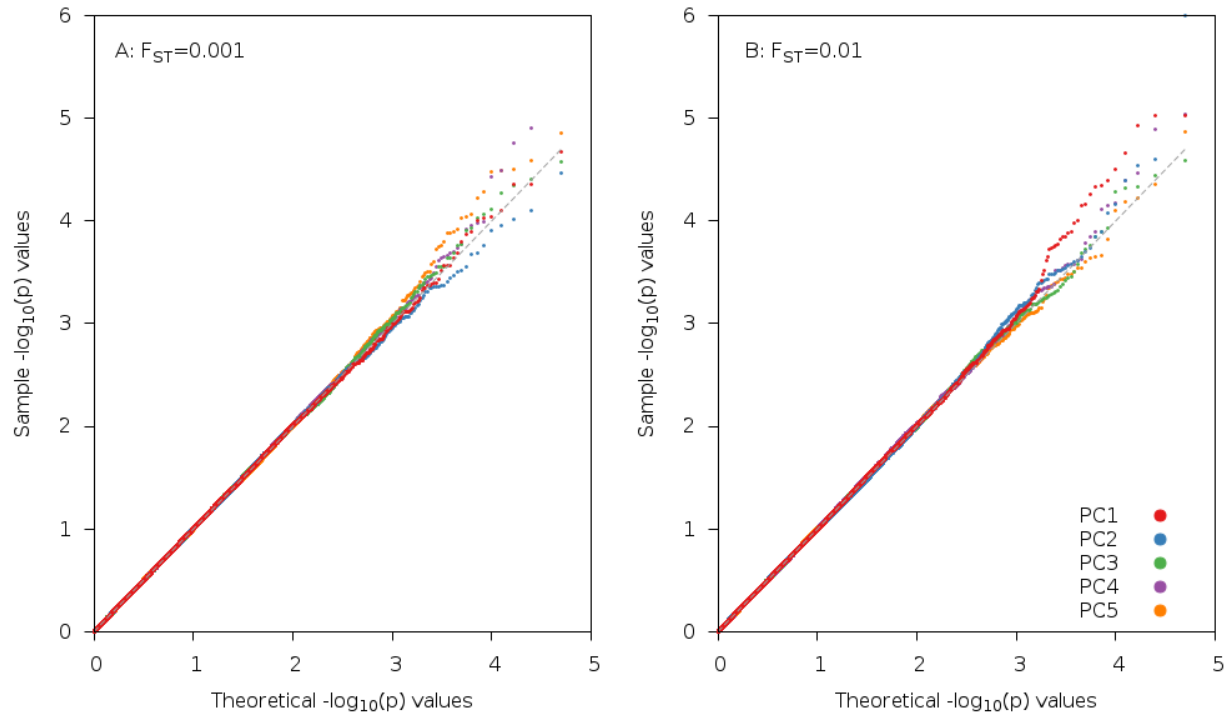

### Supplementary Figure 3. QQ-plot of the selection statistic for PCs 1-4 in GERA data.

QQ-plots of actual vs. theoretical p-values are provided for (A) selection statistics for 608,981 SNPs in the GERA sample that passed the first stage of QC, and (B) selection statistics for 599,992 SNPs excluding the genome-wide significant loci listed in Table 1. Despite clear evidence of signal at the extreme tails, the overall distribution of test statistic was not inflated in the original set of SNPs ( $.928 \leq \lambda_{GC} \leq .990$ ) nor in the filtered set ( $.966 \leq \lambda_{GC} \leq 1.01$ ).

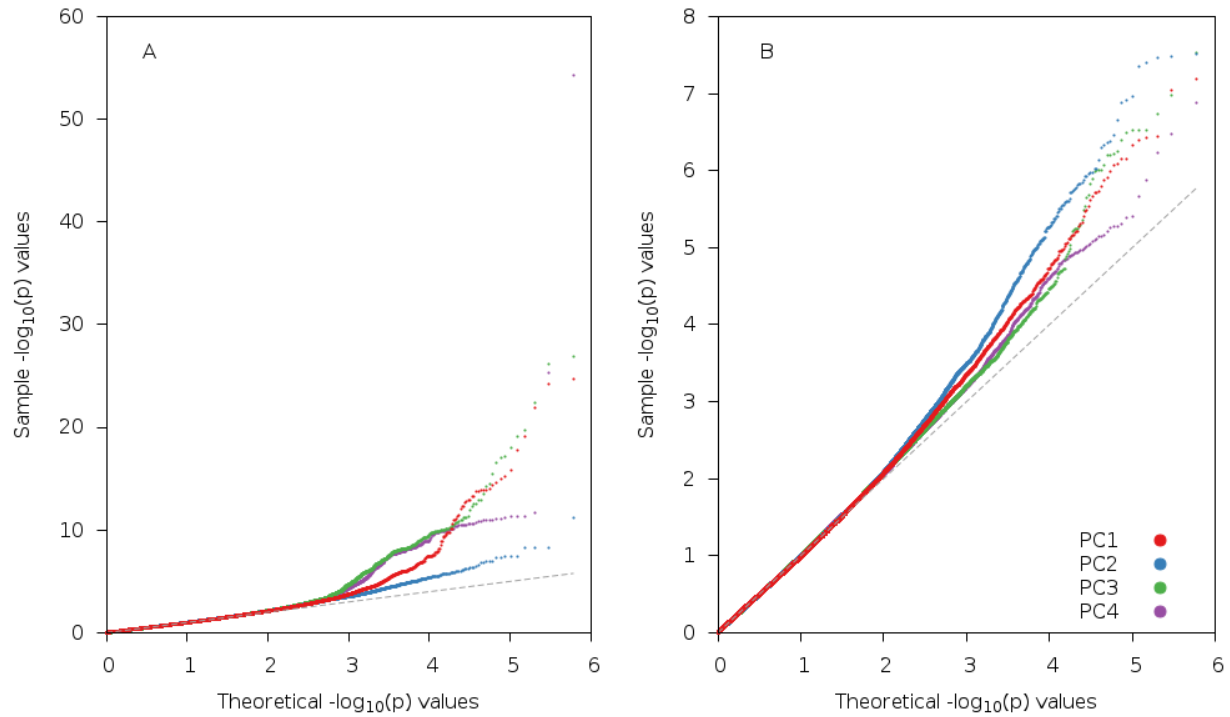

### Supplementary Figure 4. Selection statistics for PCs 5-10 in GERA data.

The selection statistics for PCs 5-10 were dominated by exceedingly large signals at one locus (PCs 5-9) or substantial correlation with missing data rate per individual (PC 10;  $\rho = 0.07$ ,  $p < 2.2 \times 10^{-16}$ ), suggesting that these PCs are caused by PC artifacts and do not represent true population structure. PCs 1-4 were not significantly correlated with missing data.

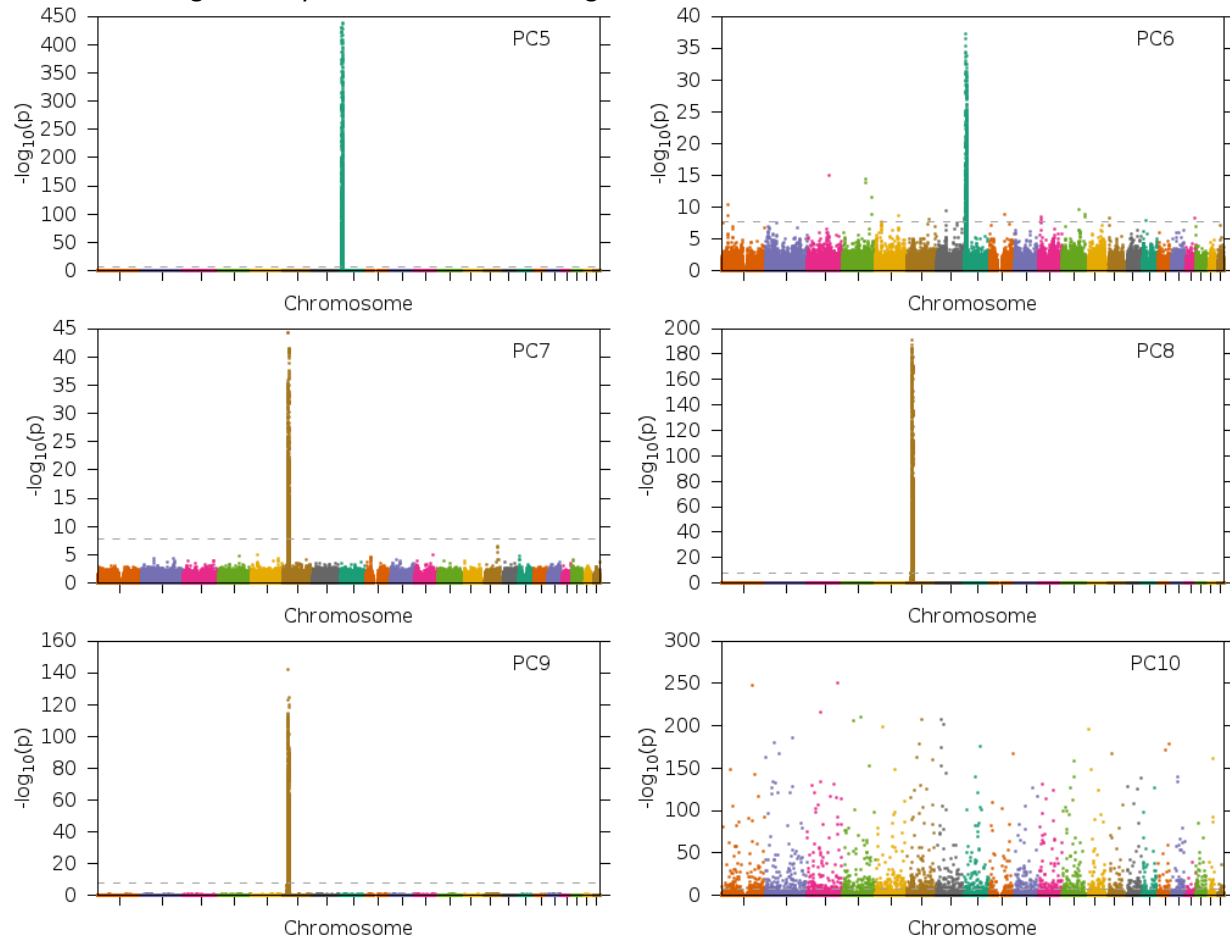

### Supplementary Figure 5. Selection statistics for PCs 1-4 in GERA data after removing significant regions.

We removed the genome-wide significant regions listed in Table 1, reran FastPCA and calculated the selection statistic across the genome. The significant hits in PCs 1-4 remain largely unchanged (Supplementary Table 4). The notable exception is the inversion on chromosome 8 spanning from 8-12 Mb. This indicates that the signal in that region was artifactual.

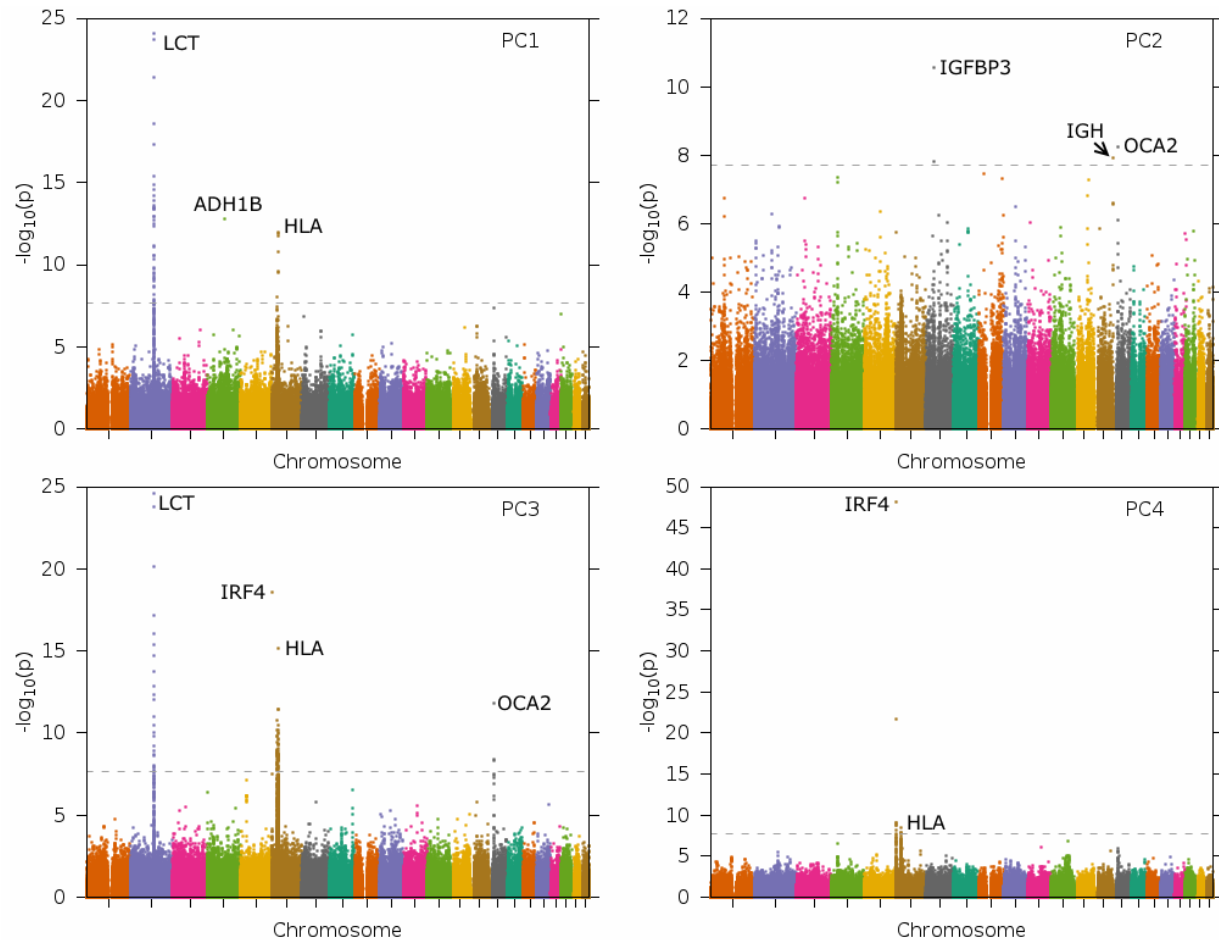

## Supplementary Tables

### Supplementary Table 1. CPU time and memory requirements of FastPCA and other methods.

We report the running time (in CPU seconds) and memory usage (GB) of PCA implementations, with standard deviation in parentheses. Runs in which smartpca, PLINK2-pca and flashpca exceeded the time constraint (100 hours) or memory constraint (40GB) are denoted as blank entries. When there are few individuals, PLINK2-pca ran faster and consumed less memory than FastPCA. However, FastPCA was able to run on 100k individuals and 100k SNPs in 56 minutes using 3.2GB of memory.

| SAMPLES<br>(×1000) | FASTPCA           |                | FLASHPCA          |                 | PLINK2-PCA          |                 | SMARTPCA            |                 |
|--------------------|-------------------|----------------|-------------------|-----------------|---------------------|-----------------|---------------------|-----------------|
|                    | CPU               | MEMORY         | CPU               | MEMORY          | CPU                 | MEMORY          | CPU                 | MEMORY          |
| <b>1</b>           | 0:01:42<br>(0:06) | 0.54<br>(0.00) | 0:00:55<br>(0:01) | 1.25<br>(0.00)  | 0:00:19<br>(0:01)   | 0.02<br>(0.00)  | 0:02:10<br>(0:10)   | 0.17<br>(0.00)  |
| <b>1.5</b>         | 0:02:00<br>(0:04) | 0.55<br>(0.00) | 0:01:41<br>(0:01) | 1.64<br>(0.00)  | 0:00:42<br>(0:01)   | 0.03<br>(0.00)  | 0:05:39<br>(0:33)   | 0.25<br>(0.00)  |
| <b>2</b>           | 0:02:18<br>(0:06) | 0.57<br>(0.00) | 0:02:44<br>(0:01) | 2.03<br>(0.00)  | 0:01:15<br>(0:01)   | 0.05<br>(0.00)  | 0:10:11<br>(0:48)   | 0.35<br>(0.00)  |
| <b>3</b>           | 0:02:53<br>(0:07) | 0.59<br>(0.00) | 0:05:38<br>(0:02) | 2.82<br>(0.00)  | 0:02:53<br>(0:04)   | 0.09<br>(0.00)  | 0:23:38<br>(1:18)   | 0.58<br>(0.00)  |
| <b>5</b>           | 0:03:58<br>(0:08) | 0.64<br>(0.00) | 0:14:31<br>(0:06) | 4.44<br>(0.00)  | 0:08:20<br>(0:17)   | 0.25<br>(0.00)  | 1:11:21<br>(7:09)   | 1.19<br>(0.00)  |
| <b>7</b>           | 0:05:08<br>(0:07) | 0.69<br>(0.00) | 0:27:24<br>(0:04) | 6.13<br>(0.00)  | 0:17:13<br>(0:19)   | 0.47<br>(0.00)  | 2:21:24<br>(8:13)   | 2.02<br>(0.00)  |
| <b>10</b>          | 0:06:56<br>(0:05) | 0.77<br>(0.00) | 0:54:37<br>(0:16) | 9.11<br>(0.00)  | 0:39:15<br>(1:08)   | 0.94<br>(0.00)  | 5:15:58<br>(16:59)  | 3.64<br>(0.00)  |
| <b>15</b>          | 0:09:50<br>(0:08) | 0.89<br>(0.00) | 2:01:16<br>(0:42) | 14.71<br>(0.00) | 1:45:43<br>(3:51)   | 2.10<br>(0.00)  | 14:13:13<br>(38:46) | 7.39<br>(0.00)  |
| <b>20</b>          | 0:13:05<br>(0:09) | 0.98<br>(0.00) | 3:32:55<br>(0:55) | 21.04<br>(0.00) | 3:41:55<br>(10:06)  | 3.70<br>(0.00)  | 29:34:22<br>(41:27) | 12.44<br>(0.00) |
| <b>30</b>          | 0:19:36<br>(0:10) | 1.22<br>(0.00) | 7:53:56<br>(2:00) | 35.96<br>(0.00) | 11:41:39<br>(12:20) | 8.27<br>(0.00)  | 73:30:37<br>(23:53) | 26.46<br>(0.00) |
| <b>50</b>          | 0:29:57<br>(0:36) | 1.69<br>(0.00) |                   |                 | 47:16:16<br>(50:39) | 22.87<br>(0.00) |                     |                 |
| <b>70</b>          | 0:41:18<br>(1:16) | 2.30<br>(0.00) |                   |                 |                     |                 |                     |                 |
| <b>100</b>         | 0:56:00<br>(1:25) | 3.20<br>(0.00) |                   |                 |                     |                 |                     |                 |

Supplementary Table 2. Proportion of significant SNPs at different thresholds in null simulations. We ran 10 simulations containing 50k SNPs and 10k simulated individuals and calculated the selection statistic under the null. We report the proportion of SNPs that meet significance at different thresholds (s.e. in parenthesis). In order for a SNP to be genome-wide significant in a simulation, its  $p$ -value must be less than  $10^{-6}$  at  $\alpha = 0.05$ . This table shows that the selection statistic is well behaved under the null.

| Threshold | $F_{ST} = 0.001$                                | $F_{ST} = 0.01$                                 |
|-----------|-------------------------------------------------|-------------------------------------------------|
| $10^{-6}$ | $2 \times 10^{-6}$ ( $6.32 \times 10^{-6}$ )    | 0 (n/a)                                         |
| $10^{-5}$ | $8 \times 10^{-6}$ ( $1 \times 10^{-5}$ )       | $1.2 \times 10^{-5}$ ( $1.69 \times 10^{-5}$ )  |
| $10^{-4}$ | $9.8 \times 10^{-5}$ ( $3.82 \times 10^{-5}$ )  | $1.2 \times 10^{-4}$ ( $6.32 \times 10^{-5}$ )  |
| $10^{-3}$ | $9.98 \times 10^{-4}$ ( $1.38 \times 10^{-4}$ ) | $1.04 \times 10^{-3}$ ( $9.18 \times 10^{-5}$ ) |
| $10^{-2}$ | $9.98 \times 10^{-3}$ ( $3.82 \times 10^{-4}$ ) | $9.85 \times 10^{-3}$ ( $3.95 \times 10^{-4}$ ) |
| $10^{-1}$ | $9.99 \times 10^{-2}$ ( $6.22 \times 10^{-4}$ ) | $9.96 \times 10^{-2}$ ( $7.70 \times 10^{-4}$ ) |

**Supplementary Table 3. Suggestive signals of selection in GERA data.**

We report the regions with suggestive ( $10^{-6} < p < 2.05 \times 10^{-8}$ ) evidence of selection (analogous to Table 1).

| <b>Locus</b>          | <b>Chromosome</b> | <b>Region (Mb)</b> | <b>PC</b> | <b>Best Hit</b> | <b>p-value</b> |
|-----------------------|-------------------|--------------------|-----------|-----------------|----------------|
|                       | 1                 | 79.3 - 79.4        | 2         | rs17590370      | 1.47e-7        |
| INPP4A                | 2                 | 98.5 - 98.5        | 2         | rs78108890      | 5.00e-7        |
| ANO10                 | 3                 | 43.7 - 43.7        | 2         | rs116086673     | 1.57e-7        |
|                       | 4                 | 4.8 - 4.8          | 3         | rs12186237      | 3.90e-7        |
| ARAP2                 | 4                 | 35.9 - 35.9        | 2         | rs116105213     | 3.78e-8        |
| TLR1 <sup>36</sup>    | 4                 | 38.5 - 38.5        | 2         | rs5743611       | 5.42e-8        |
|                       |                   |                    | 4         | rs4833095       | 6.52e-7        |
| SLC45A2 <sup>38</sup> | 5                 | 34.0 - 34.0        | 3         | rs16891982      | 6.89e-8        |
|                       | 5                 | 89.5 - 89.5        | 2         | rs72779178      | 4.22e-7        |
|                       | 6                 | 93.7 - 93.7        | 1         | rs1538270       | 5.80e-7        |
| DGKB                  | 7                 | 14.2 - 14.2        | 1         | rs59706690      | 1.43e-7        |
| CCDC146               | 7                 | 76.8 - 76.8        | 2         | rs17151162      | 5.96e-7        |
| CADPS2                | 7                 | 121.8 - 121.8      | 2         | rs6947805       | 8.58e-7        |
| PVT1                  | 8                 | 129.1 - 129.1      | 3         | rs12676558      | 2.26e-7        |
| EQTN                  | 9                 | 27.3 - 27.3        | 2         | rs41305329      | 4.25e-8        |
| RALGPS1               | 9                 | 128.8 - 128.8      | 2         | rs76798990      | 4.88e-8        |
|                       | 9                 | 135.4 - 135.4      | 2         | rs79784812      | 5.65e-7        |
| TET1                  | 10                | 70.1 - 70.1        | 2         | rs7896856       | 2.71e-7        |
|                       | 12                | 94.5 - 94.5        | 4         | rs79822723      | 2.64e-7        |
|                       | 13                | 77.2 - 77.2        | 2         | rs75892602      | 1.30e-7        |
|                       | 13                | 80.4 - 80.4        | 2         | rs117888143     | 4.13e-8        |
|                       | 13                | 83.0 - 83.0        | 1         | rs73234476      | 7.14e-7        |
|                       | 14                | 40.2 - 40.2        | 1         | rs8021234       | 5.55e-7        |
|                       | 20                | 1.8 - 1.8          | 1         | rs6045087       | 1.05e-7        |



Supplementary Table 4. Top signals of selection in GERA data using PCs computed from SNPs in other regions.

After removing Table 1 regions from the set of SNPs used to compute PCs, the selected loci remained the same except for the inversion on chromosome 8.

| Locus         | Chromosome | Region (Mb)        | PC       | Best Hit           | <i>p</i> -value                          |
|---------------|------------|--------------------|----------|--------------------|------------------------------------------|
| LCT           | 2          | 134.8 – 137.6      | 1        | rs6754311          | $8.27 \times 10^{-25}$                   |
|               |            |                    | 3        | rs4988235          | $2.50 \times 10^{-25}$                   |
| <b>ADH1B</b>  | <b>4</b>   | <b>100.5</b>       | <b>1</b> | <b>rs1229984</b>   | <b><math>1.57 \times 10^{-13}</math></b> |
| IRF4          | 6          | 0.3 – 0.5          | 3        | rs12203592         | $2.72 \times 10^{-19}$                   |
|               |            |                    | 4        | rs12203592         | $6.99 \times 10^{-49}$                   |
| HLA           | 6          | 30.8 – 32.9        | 1        | rs382259           | $1.12 \times 10^{-12}$                   |
|               |            |                    | 3        | rs9268628          | $6.98 \times 10^{-16}$                   |
|               |            |                    | 4        | rs1265103          | $3.14 \times 10^{-9}$                    |
| <b>IGFBP3</b> | <b>7</b>   | <b>45.3-45.9</b>   | <b>2</b> | <b>rs150353309</b> | <b><math>2.69 \times 10^{-11}</math></b> |
| <b>IGH</b>    | <b>14</b>  | <b>106.0-106.1</b> | <b>2</b> | <b>rs34614900</b>  | <b><math>1.19 \times 10^{-8}</math></b>  |
| OCA2          | 15         | 25.9 – 26.2        | 2        | rs12916300         | $5.81 \times 10^{-9}$                    |
|               |            |                    | 3        | rs12916300         | $1.55 \times 10^{-12}$                   |

**Supplementary Table 5. Performance of natural selection statistic in subsampled data.**

The selection statistic was computed in random subsets of individuals of specified size for each SNP in Table 1 (except for the chromosome 8 inversion region) and the known selection regions TLR and SLC45A2 in Supplementary Table 3. We report the median selection statistic P-value across 100 random subsets.

| Locus   | SNP         | Sample size   |          |          |          |          |          |          |
|---------|-------------|---------------|----------|----------|----------|----------|----------|----------|
|         |             | Full data set | 1k       | 2k       | 5k       | 10k      | 20k      | 50k      |
| LCT     | rs6754311   | 2.15e-25      | 4.91e-17 | 2.97e-20 | 1.53e-23 | 1.17e-24 | 2.63e-25 | 1.02e-26 |
|         | rs4988235   | 1.15e-27      | 7.44e-17 | 9.80e-20 | 4.64e-23 | 3.11e-24 | 2.69e-25 | 1.62e-27 |
|         | rs17346504  | 8.41e-7       | 2.86e-2  | 1.25e-2  | 9.49e-4  | 6.03e-5  | 8.12e-6  | 9.80e-7  |
| ADH1B   | rs1229984   | 1.26e-13      | 3.91e-9  | 3.51e-11 | 1.97e-12 | 5.54e-13 | 1.50e-13 | 1.31e-13 |
| IRF4    | rs12203592  | 5.52e-55      | 3.15e-6  | 9.18e-12 | 7.47e-25 | 7.21e-36 | 7.02e-45 | 2.19e-54 |
| HLA     | rs382259    | 5.38e-13      | 8.68e-9  | 1.23e-10 | 7.07e-12 | 1.85e-12 | 7.51e-13 | 5.77e-13 |
|         | rs9268628   | 8.66e-18      | 3.62e-5  | 3.41e-7  | 5.97e-12 | 2.10e-14 | 2.68e-16 | 1.00e-17 |
|         | rs4394275   | 9.36e-12      | 8.40e-2  | 1.94e-3  | 1.44e-5  | 4.00e-8  | 7.86e-10 | 1.24e-11 |
| IGFBP3  | rs150353309 | 5.82e-12      | 5.90e-4  | 1.49e-5  | 2.72e-8  | 3.61e-10 | 3.34e-11 | 6.61e-12 |
| IGH     | rs34614900  | 5.23e-9       | 6.33e-3  | 2.24e-4  | 2.26e-6  | 2.01e-7  | 3.32e-8  | 5.32e-9  |
| OCA2    | rs12916300  | 2.80e-13      | 6.29e-6  | 1.07e-7  | 3.67e-9  | 1.94e-11 | 5.29e-12 | 3.11e-13 |
|         | rs2703951   | 5.11e-7       | 1.12e-1  | 2.45e-2  | 7.96e-4  | 7.17e-5  | 4.52e-6  | 5.74e-7  |
| TLR1    | rs5743611   | 5.42e-8       | 8.05e-3  | 4.27e-4  | 9.41e-6  | 1.19e-6  | 2.17e-7  | 5.60e-8  |
|         | rs4833095   | 6.52e-7       | 6.07e-4  | 3.37e-4  | 7.35e-5  | 3.64e-5  | 6.03e-6  | 7.10e-7  |
| SLC45A2 | rs16891982  | 6.89e-8       | 8.25e-4  | 2.17e-4  | 1.93e-5  | 4.55e-6  | 2.46e-7  | 7.31e-8  |

**Supplementary Table 6. Allele frequencies for novel loci in GERA subpopulations.**

The GERA sample was clustered into 5 discrete subpopulations using  $k$ -means clustering run on the top 4 PCs. Individual clusters were labelled to coincide with SNPweights and projected POPRES individuals. These were Ashkenazi Jewish (AJ), Eastern European (EE), Irish (IR), Northern European (NE) and South-east European (SE). Results are reported only for genome-wide significant SNPs at novel loci. We also report  $F_{ST}$  between each pair of subpopulations.

|        |             | <b>AJ</b> | <b>EE</b> | <b>IR</b> | <b>NE</b> | <b>SE</b> |
|--------|-------------|-----------|-----------|-----------|-----------|-----------|
| Count  |             | 2,750     | 4,196     | 14,771    | 28,439    | 4,578     |
| ADH1B  | rs1229984   | 21.37%    | 4.99%     | 2.66%     | 2.96%     | 9.58%     |
| IGFBP3 | rs150353309 | 1.66%     | 4.38%     | 0.76%     | 1.10%     | 0.79%     |
|        | rs35751739  | 2.47%     | 7.71%     | 2.68%     | 3.06%     | 2.19%     |
| IGH    | rs34614900  | 13.63%    | 26.78%    | 17.29%    | 18.92%    | 12.73%    |

|           | <b>AJ</b> | <b>EE</b> | <b>IR</b> | <b>NE</b> |
|-----------|-----------|-----------|-----------|-----------|
| <b>EE</b> | 0.00684   |           |           |           |
| <b>IR</b> | 0.00671   | 0.00095   |           |           |
| <b>NE</b> | 0.00655   | 0.00073   | 0.00013   |           |
| <b>SE</b> | 0.00345   | 0.00239   | 0.00193   | 0.00182   |

**Supplementary Table 7. Natural selection at ADH1B between discrete subpopulations.**

The discrete-population selection statistic<sup>21</sup> (see Online Methods) for each pair of populations was calculated (below the diagonal) as well as the statistic comparing the frequency of rs1229984 in that population with the set of remaining individuals (diagonal). Genome-wide significant comparisons are those with  $p < 5.47 \times 10^{-9}$  (608,981 SNPs  $\times$  15 subpopulation comparisons = 9,134,715 tests with  $\alpha = 0.05$ ).

| <b>rs1229984</b> | <b>AJ</b> | <b>EE</b> | <b>IR</b> | <b>NE</b> | <b>SE</b> |
|------------------|-----------|-----------|-----------|-----------|-----------|
| <b>AJ</b>        | 1.47e-06  |           |           |           |           |
| <b>EE</b>        | 4.15e-05  | 0.556     |           |           |           |
| <b>IR</b>        | 8.31e-07  | 0.00731   | 1.83e-08  |           |           |
| <b>NE</b>        | 1.04e-06  | 0.00932   | 0.293     | 2.61e-10  |           |
| <b>SE</b>        | 0.000121  | 0.0126    | 4.98e-06  | 8.84e-06  | 0.00012   |

**Supplementary Table 8. ADH1B haplotypes in 1000 genomes.**

Densities of known haplotypes in 1000 genomes Asian and European populations were calculated. 9 SNPs were used to determine haplotype and novel haplotypes were excluded from the analysis. 98% of the European haplotypes did not contain the derived allele (T) at rs122998 (above double bar line) compared to 20.8% of Asian haplotypes. The derived allele (A) of the regulatory SNP rs3811801 was not found at all in European populations, while haplotype H7 which contains this allele is the most common haplotype in Asian populations.

| Haplotype | rs169343 | rs381180 | rs115991 | rs122998 | rs414753 | rs207563 | rs206670 | rs17033 | rs104202 | Asian<br>(CHB, CHS,<br>JPT) | European<br>(CEU, FIN,<br>GBR, IBS, TSI) | African<br>(ASW, LWK,<br>YRI) |
|-----------|----------|----------|----------|----------|----------|----------|----------|---------|----------|-----------------------------|------------------------------------------|-------------------------------|
| H1b       | G        | G        | C        | C        | C        | T        | G        | T       | T        | 1.96%                       | 40.11%                                   | 14.97%                        |
| H1c       | G        | G        | C        | C        | A        | T        | G        | T       | T        | 0%                          | 0.14%                                    | 5.21%                         |
| H2        | G        | G        | A        | C        | C        | T        | G        | T       | T        | 0%                          | 0.84%                                    | 18.66%                        |
| H2b       | G        | G        | A        | C        | C        | T        | G        | C       | T        | 9.46%                       | 10.10%                                   | 9.33%                         |
| H3        | G        | G        | C        | C        | C        | C        | A        | T       | C        | 8.04%                       | 27.21%                                   | 4.34%                         |
| H3c       | G        | G        | C        | C        | C        | C        | G        | T       | T        | 0%                          | 0%                                       | 0.43%                         |
| H4        | G        | G        | A        | C        | A        | T        | G        | T       | T        | 6.96%                       | 17.67%                                   | 46.42%                        |
| H4b       | A        | G        | A        | C        | A        | T        | G        | T       | T        | 0%                          | 1.96%                                    | 0.65%                         |
| H5        | G        | G        | C        | T        | C        | T        | G        | T       | T        | 0.36%                       | 1.12%                                    | 0%                            |
| H5b       | A        | G        | A        | T        | A        | T        | G        | T       | T        | 0.18%                       | 0.56%                                    | 0%                            |
| H6        | G        | G        | C        | T        | C        | C        | A        | T       | C        | 12.14%                      | 0.28%                                    | 0%                            |
| H7        | G        | A        | C        | T        | C        | C        | A        | T       | C        | 60.89%                      | 0%                                       | 0%                            |

**Supplementary Table 9. Natural selection at IGFBP3 between discrete subpopulations.**

As in Supplementary Table 7, but for SNPs rs150353309 and rs150353309 in IGFBP3 which were under selection. Genome-wide significant comparisons are those with  $p < 5.47 \times 10^{-9}$  (608,981 SNPs  $\times$  15 subpopulation comparisons = 9,134,715 tests with  $\alpha = 0.05$ ).

| <b>rs150353309</b> | <b>AJ</b> | <b>EE</b> | <b>IR</b> | <b>NE</b> | <b>SE</b> |
|--------------------|-----------|-----------|-----------|-----------|-----------|
| <b>AJ</b>          | 0.755     |           |           |           |           |
| <b>EE</b>          | 0.178     | 4.07e-07  |           |           |           |
| <b>IR</b>          | 0.48      | 4.38e-07  | 0.00441   |           |           |
| <b>NE</b>          | 0.678     | 4.62e-07  | 0.0429    | 0.217     |           |
| <b>SE</b>          | 0.351     | 0.0014    | 0.955     | 0.6       | 0.374     |

  

| <b>rs35751739</b> | <b>AJ</b> | <b>EE</b> | <b>IR</b> | <b>NE</b> | <b>SE</b> |
|-------------------|-----------|-----------|-----------|-----------|-----------|
| <b>AJ</b>         | 0.675     |           |           |           |           |
| <b>EE</b>         | 0.0438    | 1.24e-07  |           |           |           |
| <b>IR</b>         | 0.909     | 5.99e-07  | 0.0703    |           |           |
| <b>NE</b>         | 0.757     | 2.33e-07  | 0.207     | 0.451     |           |
| <b>SE</b>         | 0.827     | 0.000332  | 0.614     | 0.379     | 0.233     |

**Supplementary Table 10. Natural selection at IGH between discrete subpopulations.**

As in Supplementary Table 7, but for SNP rs34614900 in IGH which was under selection and SNPs rs35237072 and rs34479337 were suggestive with  $p$ -value  $< 10^{-6}$ . Genome-wide significant comparisons are those with  $p < 5.47 \times 10^{-9}$  (608,981 SNPs  $\times$  15 subpopulation comparisons = 9,134,715 tests with  $\alpha = 0.05$ ).

| <b>rs34614900</b> | <b>AJ</b> | <b>EE</b> | <b>IR</b> | <b>NE</b> | <b>SE</b> |
|-------------------|-----------|-----------|-----------|-----------|-----------|
| <b>AJ</b>         | 0.23      |           |           |           |           |
| <b>EE</b>         | 0.00557   | 8.17e-08  |           |           |           |
| <b>IR</b>         | 0.386     | 4.43e-07  | 0.12      |           |           |
| <b>NE</b>         | 0.214     | 2.65e-06  | 0.0165    | 0.173     |           |
| <b>SE</b>         | 0.754     | 6.35e-07  | 0.0437    | 0.00577   | 0.00347   |

  

| <b>rs35237072</b> | <b>AJ</b> | <b>EE</b> | <b>IR</b> | <b>NE</b> | <b>SE</b> |
|-------------------|-----------|-----------|-----------|-----------|-----------|
| <b>AJ</b>         | 0.378     |           |           |           |           |
| <b>EE</b>         | 0.0151    | 2.76e-07  |           |           |           |
| <b>IR</b>         | 0.554     | 1.37e-06  | 0.151     |           |           |
| <b>NE</b>         | 0.373     | 3.21e-06  | 0.0569    | 0.432     |           |
| <b>SE</b>         | 0.771     | 1.13e-05  | 0.139     | 0.0384    | 0.0245    |

  

| <b>rs34479337</b> | <b>AJ</b> | <b>EE</b> | <b>IR</b> | <b>NE</b> | <b>SE</b> |
|-------------------|-----------|-----------|-----------|-----------|-----------|
| <b>AJ</b>         | 0.616     |           |           |           |           |
| <b>EE</b>         | 0.0472    | 1.52e-06  |           |           |           |
| <b>IR</b>         | 0.745     | 1.39e-05  | 0.371     |           |           |
| <b>NE</b>         | 0.613     | 9.15e-06  | 0.247     | 0.655     |           |
| <b>SE</b>         | 0.305     | 6.72e-06  | 0.0489    | 0.0183    | 0.0079    |
